# Supplementary material
Source: PubMed Central journal article supplement (PMC5563805)
Supplement: rspb20170893supp1.pdf [file rspb20170893supp1.pdf]

## Model Code

```
data{
  int<lower=1> N;
  int<lower=1> N_id;
  int<lower=1> N_BU;
  real y[N];
  real MASS[N];
  real HUNG[N];
  real TEMP[N];
  int ARENA[N];
  int id[N];
  int BU[N];
}
parameters{
  vector[4] re_id[N_id];
  vector[3] re_b[N_BU];
  vector[9] re_ar;
  vector[4] b;
  vector[4] g;
  vector<lower=0,upper=10>[4] sd_id;
  vector<lower=0,upper=10>[3] sd_b;
  real<lower=0,upper=10> sd_ar;
  corr_matrix[4] id_cor;
  corr_matrix[3] b_cor;
}
model{
  vector[N] sdy;
  vector[N] muy;

  id_cor ~ lkj_corr(4);
  b_cor ~ lkj_corr(3);
  //sd_id ~ uniform(0, 10); // prior implied in 'parameters' block
  //sd_b ~ uniform(0, 10);

  b ~ normal(0,100);
  g ~ normal(0,100);

  //setup random effect term
  re_id ~ multi_normal( rep_vector(0,4) , quad_form_diag(id_cor,sd_id));
  re_b ~ multi_normal( rep_vector(0,3) , quad_form_diag(b_cor ,sd_b ));
  re_ar ~ normal(0, sd_ar);

  for ( i in 1:N ) {
    muy[i] <- (b[1] + re_id[id[i],1] + re_b[BU[i],1] + re_ar[ARENA[i]]) +
      (b[2] + re_id[id[i],2] + re_b[BU[i],2]) * TEMP[i] +
      (b[3] + re_id[id[i],3] + re_b[BU[i],3]) * HUNG[i] +
      b[4] * MASS[i];

    sdy[i] <- exp(g[1] + g[2]*TEMP[i] + g[3]*HUNG[i] + g[4]*MASS[i] +
      re_id[id[i],4]);
  }

  y ~ normal( muy , sdy );
}
```

## Model Output

| Param                                | Predictor         | Predictor 2      | MeanEst.      | Est. SD      | Credibility Quantiles |               |               |
|--------------------------------------|-------------------|------------------|---------------|--------------|-----------------------|---------------|---------------|
|                                      |                   |                  |               |              | 2.50%                 | 50%           | 97.50%        |
| Mean Model Fixed Effects             |                   |                  |               |              |                       |               |               |
| $\beta_0$                            | <i>int</i>        |                  | 0.139         | 0.107        | -0.070                | 0.139         | 0.349         |
| $\beta_1$                            | <b>Temp.</b>      |                  | <b>0.312</b>  | <b>0.038</b> | <b>0.239</b>          | <b>0.311</b>  | <b>0.388</b>  |
| $\beta_2$                            | <b>Food Dep.</b>  |                  | <b>-0.271</b> | <b>0.040</b> | <b>-0.351</b>         | <b>-0.270</b> | <b>-0.193</b> |
| $\beta_3$                            | <b>Mass</b>       |                  | <b>-0.303</b> | <b>0.097</b> | <b>-0.494</b>         | <b>-0.304</b> | <b>-0.111</b> |
| Residual Model Fixed Effects         |                   |                  |               |              |                       |               |               |
| $\gamma_0$                           | <i>int</i>        |                  | <b>-0.815</b> | <b>0.067</b> | <b>-0.947</b>         | <b>-0.815</b> | <b>-0.684</b> |
| $\gamma_1$                           | <b>Temp.</b>      |                  | <b>-0.149</b> | <b>0.049</b> | <b>-0.244</b>         | <b>-0.149</b> | <b>-0.053</b> |
| $\gamma_2$                           | <b>Food Dep.</b>  |                  | <b>-0.183</b> | <b>0.064</b> | <b>-0.309</b>         | <b>-0.182</b> | <b>-0.058</b> |
| $\gamma_3$                           | Mass              |                  | -0.038        | 0.063        | -0.163                | -0.038        | 0.085         |
| Among-individual Standard Deviations |                   |                  |               |              |                       |               |               |
| $\sigma_0$                           | <i>int</i>        |                  | 0.746         | 0.076        | 0.614                 | 0.740         | 0.910         |
| $\sigma_1$                           | Temp.             |                  | 0.163         | 0.033        | 0.105                 | 0.162         | 0.233         |
| $\sigma_2$                           | Food Dep.         |                  | 0.163         | 0.049        | 0.065                 | 0.163         | 0.260         |
| $\omega_3$                           | SD int            |                  | 0.448         | 0.050        | 0.361                 | 0.444         | 0.557         |
| Individual Correlations              |                   |                  |               |              |                       |               |               |
| $r_{0,1}$                            | <i>int</i>        | Temp.            | 0.300         | 0.170        | -0.047                | 0.305         | 0.616         |
| $r_{0,2}$                            | <i>int</i>        | Food Dep.        | -0.356        | 0.181        | -0.680                | -0.365        | 0.026         |
| $r_{0,3}$                            | <b><i>int</i></b> | <b>SD int</b>    | <b>0.285</b>  | <b>0.125</b> | <b>0.026</b>          | <b>0.291</b>  | <b>0.513</b>  |
| $r_{1,2}$                            | Temp.             | Food Dep.        | -0.212        | 0.227        | -0.632                | -0.219        | 0.247         |
| $r_{1,3}$                            | <b>Temp.</b>      | <b>SD int</b>    | <b>0.529</b>  | <b>0.155</b> | <b>0.196</b>          | <b>0.541</b>  | <b>0.796</b>  |
| $r_{2,3}$                            | Food Dep.         | SD int           | -0.254        | 0.188        | -0.612                | -0.257        | 0.125         |
| Among-(ID*Burst) Standard Deviations |                   |                  |               |              |                       |               |               |
| $\sigma_0$                           | <i>int</i>        |                  | 0.334         | 0.029        | 0.280                 | 0.333         | 0.394         |
| $\sigma_1$                           | Temp.             |                  | 0.058         | 0.043        | 0.004                 | 0.049         | 0.161         |
| $\sigma_2$                           | Food Dep.         |                  | 0.203         | 0.054        | 0.093                 | 0.203         | 0.307         |
| (ID*Burst) Correlations              |                   |                  |               |              |                       |               |               |
| $r_{0,1}$                            | <i>int</i>        | Temp.            | 0.058         | 0.322        | -0.589                | 0.069         | 0.656         |
| $r_{0,2}$                            | <b><i>int</i></b> | <b>Food Dep.</b> | <b>-0.541</b> | <b>0.149</b> | <b>-0.793</b>         | <b>-0.555</b> | <b>-0.213</b> |
| $r_{1,2}$                            | Temp.             | Food Dep.        | 0.061         | 0.338        | -0.607                | 0.070         | 0.681         |
| Arena intercept Standard Deviation   |                   |                  |               |              |                       |               |               |
| $\sigma$                             | <i>int</i>        |                  | 0.063         | 0.025        | 0.028                 | 0.058         | 0.124         |
